# Supplementary material
Source: PubMed Central journal article supplement (PMC4056273)
Supplement: supp_jlb.3A1013-541R_jlb.3A1013-541RSuppData.pdf [file supp_jlb.3A1013-541R_jlb.3A1013-541RSuppData.pdf]

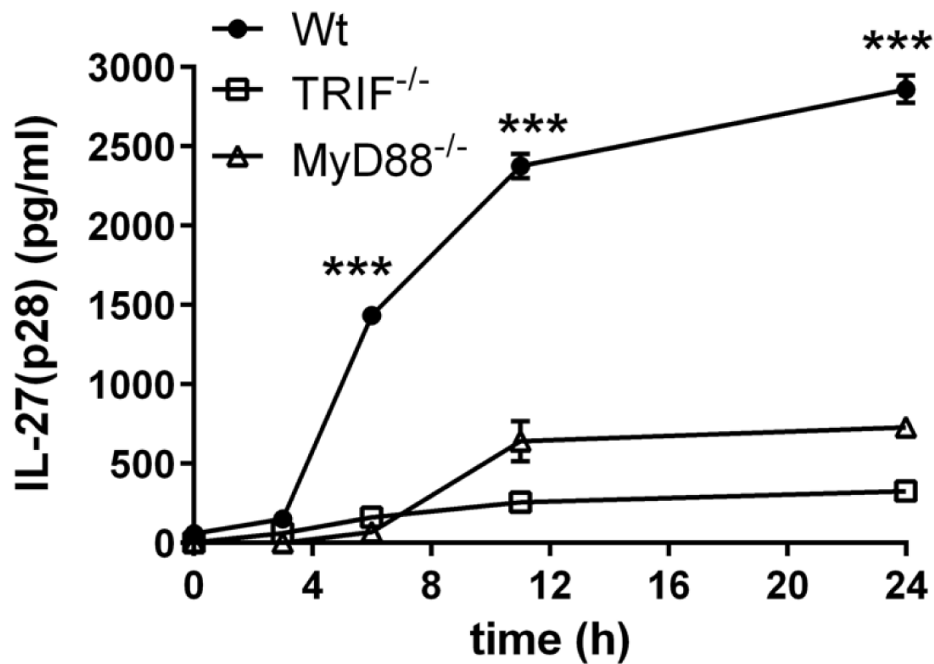

**Supplementary Figure 1:** Dependency of IL-27 production on MyD88 and TRIF. IL-27(p28) release by BMDM from Wt mice, MyD88<sup>-/-</sup> mice or TRIF<sup>-/-</sup> mice. BMDM were stimulated with LPS (1  $\mu$ g/ml) for the indicated time periods and IL-27p28 quantified in supernatants by ELISA. Concentrations of IL-27p28 were significantly higher in supernatants from BMDM derived from Wt mice as compared to BMDM derived from MyD88<sup>-/-</sup> or TRIF<sup>-/-</sup> mice. \*\*\*P<0.001, one-way ANOVA.
